# Supplementary material for: Assessment of Visit‐to‐Visit Blood Pressure Variability in Adults With Optimal Blood Pressure: A New Player in the Evaluation of Residual Cardiovascular Risk?
Source: PubMed Central journal article supplement — J Am Heart Assoc. 2022 Apr 26;11(9):e022716. doi: 10.1161/JAHA.121.022716 (PMC9238602; doi:10.1161/jaha.121.022716), 2022-04-26
Supplement: JAH3-11-e022716-s001.pdf [file JAH3-11-e022716-s001.pdf]

# **Supplemental Material**

**Table S1. Correlations among four SBP variabilities and mean SBP.**

| Variables          | Mean SBP | SD <sub>SBP</sub> | CV <sub>SBP</sub> | ARV <sub>SBP</sub> | VIM <sub>SBP</sub> |
|--------------------|----------|-------------------|-------------------|--------------------|--------------------|
| Mean SBP           | 1        | —                 | —                 | —                  | —                  |
| SD <sub>SBP</sub>  | 0.114*   | 1                 | —                 | —                  | —                  |
| CV <sub>SBP</sub>  | -0.012   | 0.990*            | 1                 | —                  | —                  |
| ARV <sub>SBP</sub> | 0.114*   | 0.885*            | 0.873*            | 1                  | —                  |
| VIM <sub>SBP</sub> | 0.021    | 0.994*            | 0.999*            | 0.878*             | 1                  |

Pearson's correlation coefficients are shown. \* indicates the correlation between different variables. SBP variabilities were determined based on 3 clinic blood pressure measurements from visit 1 to visit 3. SBP: systolic blood pressure; SD: standard deviation; CV: coefficient of variation; ARV: average real variability; VIM: variability independent of the mean.

**Table S2. Risk of secondary outcomes associated with SBP variability measured by VIM in participants with optimal SBP levels.**

| SBP Variability               | No. of Events /Total No. | Cumulative Incidence % (95% CI) | Model 1 HR (95% CI) | Model 2 HR (95% CI) | Model 3 HR (95% CI) |
|-------------------------------|--------------------------|---------------------------------|---------------------|---------------------|---------------------|
| <b>All-cause mortality</b>    |                          |                                 |                     |                     |                     |
| VIM Q1                        | 437/1766                 | 29.7 (26.3-33.4)                | 1.00 (Reference)    | 1.00 (Reference)    | 1.00 (Reference)    |
| VIM Q2                        | 477/1767                 | 33.0 (28.9-37.6)                | 1.12 (0.98-1.27)    | 1.10 (0.97-1.26)    | 1.11 (0.98-1.27)    |
| VIM Q3                        | 511/1766                 | 32.0 (29.5-34.7)                | 1.19 (1.05-1.35)    | 1.18 (1.04-1.33)    | 1.19 (1.05-1.35)    |
| VIM Q4                        | 548/1766                 | 35.5 (32.6-38.6)                | 1.30 (1.15-1.48)    | 1.24 (1.09-1.41)    | 1.26 (1.11-1.44)    |
| <i>P</i> for trend            | —                        | < 0.001                         | < 0.001             | 0.001               | 0.001               |
| <b>Coronary heart disease</b> |                          |                                 |                     |                     |                     |
| VIM Q1                        | 178/1766                 | 12.6 (10.1-15.6)                | 1.00 (Reference)    | 1.00 (Reference)    | 1.00 (Reference)    |
| VIM Q2                        | 148/1767                 | 9.8 (8.3-11.5)                  | 0.86 (0.69-1.07)    | 0.84 (0.68-1.05)    | 0.84 (0.68-1.05)    |
| VIM Q3                        | 158/1766                 | 10.6 (9.1-12.4)                 | 0.93 (0.75-1.16)    | 0.92 (0.74-1.14)    | 0.93 (0.75-1.15)    |
| VIM Q4                        | 186/1766                 | 13.8 (11.8-16.1)                | 1.14 (0.93-1.40)    | 1.13 (0.92-1.39)    | 1.11 (0.90-1.37)    |
| <i>P</i> for trend            | —                        | 0.340                           | 0.178               | 0.214               | 0.287               |
| <b>Stroke</b>                 |                          |                                 |                     |                     |                     |
| VIM Q1                        | 97/1766                  | 7.2 (5.8-8.9)                   | 1.00 (Reference)    | 1.00 (Reference)    | 1.00 (Reference)    |
| VIM Q2                        | 99/1767                  | 6.6 (5.4-8.0)                   | 1.05 (0.79-1.38)    | 1.05 (0.79-1.40)    | 1.07 (0.80-1.42)    |
| VIM Q3                        | 99/1766                  | 6.8 (5.5-8.3)                   | 1.04 (0.79-1.38)    | 1.05 (0.79-1.39)    | 1.07 (0.81-1.43)    |
| VIM Q4                        | 93/1766                  | 6.7 (5.4-8.2)                   | 0.98 (0.74-1.31)    | 0.97 (0.73-1.30)    | 1.00 (0.75-1.34)    |
| <i>P</i> for trend            | —                        | 0.956                           | 0.908               | 0.865               | 0.966               |
| <b>Heart failure</b>          |                          |                                 |                     |                     |                     |
| VIM Q1                        | 204/1766                 | 14.6 (12.5-16.9)                | 1.00 (Reference)    | 1.00 (Reference)    | 1.00 (Reference)    |
| VIM Q2                        | 208/1767                 | 14.5 (12.6-16.7)                | 1.02 (0.84-1.24)    | 1.02 (0.84-1.24)    | 1.04 (0.86-1.27)    |
| VIM Q3                        | 215/1766                 | 15.0 (13.0-17.3)                | 1.05 (0.86-1.27)    | 1.07 (0.88-1.30)    | 1.10 (0.90-1.33)    |
| VIM Q4                        | 261/1766                 | 19.1 (16.8-21.7)                | 1.30 (1.08-1.56)    | 1.26 (1.05-1.52)    | 1.28 (1.06-1.55)    |
| <i>P</i> for trend            | —                        | 0.001                           | 0.006               | 0.011               | 0.009               |

VIM: variability independent of the mean; SBP: systolic blood pressure; HR: hazard ratio; CI: confidence interval.

Model 1: adjusted for age, sex, race at visit 3;

Model 2: adjusted for model 1 + education level, body mass index; smoking status, drinking status, total cholesterol, high-density lipoprotein cholesterol, prevalent diabetes, use of aspirin and statin at visit 3;

Model 3: adjusted for model 2 + prevalent hypertension; use of antihypertensive drugs; diastolic blood pressure at visit 3, trend and mean of SBP from visit 1 to visit 3.

**Table S3. Risk of cardiovascular outcomes associated with SBP variability (VIM) as a continuous variable (per 1\_SD = 3.73) in participants with optimal SBP levels.**

| Outcomes               | No. of Events (%) | Model 1          |                | Model 2          |                | Model 3          |                |
|------------------------|-------------------|------------------|----------------|------------------|----------------|------------------|----------------|
|                        |                   | HR (95% CI)      | <i>P</i> Value | HR (95% CI)      | <i>P</i> Value | HR (95% CI)      | <i>P</i> Value |
| MACE                   | 2691 (38.1)       | 1.08 (1.04-1.12) | < 0.001        | 1.06 (1.02-1.10) | 0.002          | 1.06 (1.02-1.10) | 0.002          |
| Secondary outcomes     |                   |                  |                |                  |                |                  |                |
| All-cause mortality    | 1973 (27.9)       | 1.10 (1.05-1.14) | < 0.001        | 1.07 (1.03-1.12) | 0.001          | 1.08 (1.03-1.13) | 0.001          |
| Coronary heart disease | 670 (9.5)         | 1.06 (0.99-1.14) | 0.113          | 1.06 (0.98-1.14) | 0.143          | 1.05 (0.97-1.13) | 0.243          |
| Stroke                 | 388 (5.5)         | 0.98 (0.88-1.08) | 0.675          | 0.97 (0.88-1.08) | 0.585          | 0.98 (0.89-1.08) | 0.693          |
| Heart failure          | 888 (12.6)        | 1.10 (1.03-1.18) | 0.003          | 1.09 (1.02-1.16) | 0.009          | 1.09 (1.02-1.16) | 0.010          |

VIM: variability independent of the mean; SBP: systolic blood pressure; SD: standard deviation; HR: hazard ratio; CI: confidence interval; MACE: major adverse cardiovascular event.

MACE was defined as the first occurrence of all-cause mortality, coronary heart disease, stroke, and heart failure.

Model 1: adjusted for age, sex, race at visit 3;

Model 2: adjusted for model 1 + education level, body mass index; smoking status, drinking status, total cholesterol, high-density lipoprotein cholesterol, prevalent diabetes, use of aspirin and statin at visit 3;

Model 3: adjusted for model 2 + prevalent hypertension; use of antihypertensive drugs; diastolic blood pressure at visit 3, trend and mean of SBP from visit 1 to visit 3.

**Table S4. Risk of MACE associated with SBP variability (SD, CV, or ARV) in participants with optimal SBP levels.**

| SBP Variability                | No. of Events<br>/Total No. | Cumulative Incidence<br>% (95% CI) | Model 1<br>HR (95% CI) | Model 2<br>HR (95% CI) | Model 3<br>HR (95% CI) |
|--------------------------------|-----------------------------|------------------------------------|------------------------|------------------------|------------------------|
| Standard deviation (SD)        |                             |                                    |                        |                        |                        |
| SD Q1                          | 627/1778                    | 39.9 (36.0-44.0)                   | 1.00 (Reference)       | 1.00 (Reference)       | 1.00 (Reference)       |
| SD Q2                          | 633/1794                    | 38.4 (35.8-41.1)                   | 1.01 (0.91-1.13)       | 1.01 (0.90-1.13)       | 1.02 (0.91-1.14)       |
| SD Q3                          | 693/1762                    | 43.0 (40.1-45.9)                   | 1.13 (1.02-1.26)       | 1.11 (1.00-1.24)       | 1.11 (1.00-1.24)       |
| SD Q4                          | 738/1731                    | 46.1 (43.4-48.9)                   | 1.26 (1.13-1.40)       | 1.20 (1.08-1.34)       | 1.19 (1.07-1.33)       |
| <i>P</i> for trend             | —                           | < 0.001                            | < 0.001                | < 0.001                | 0.001                  |
| Coefficient of variation (CV)  |                             |                                    |                        |                        |                        |
| CV Q1                          | 632/1765                    | 39.2 (36.2-42.2)                   | 1.00 (Reference)       | 1.00 (Reference)       | 1.00 (Reference)       |
| CV Q2                          | 646/1763                    | 42.0 (37.6-46.7)                   | 1.04 (0.93-1.16)       | 1.03 (0.92-1.15)       | 1.04 (0.94-1.17)       |
| CV Q3                          | 687/1771                    | 41.4 (38.9-44.0)                   | 1.10 (0.99-1.23)       | 1.09 (0.98-1.21)       | 1.11 (0.99-1.23)       |
| CV Q4                          | 726/1766                    | 45.2 (42.3-48.2)                   | 1.21 (1.09-1.34)       | 1.18 (1.06-1.31)       | 1.21 (1.08-1.35)       |
| <i>P</i> for trend             | —                           | < 0.001                            | < 0.001                | 0.002                  | < 0.001                |
| Average real variability (ARV) |                             |                                    |                        |                        |                        |
| ARV Q1                         | 559/1527                    | 40.1 (37.0-43.4)                   | 1.00 (Reference)       | 1.00 (Reference)       | 1.00 (Reference)       |
| ARV Q2                         | 667/1961                    | 38.2 (34.5-42.2)                   | 0.91 (0.81-1.02)       | 0.92 (0.82-1.03)       | 0.91 (0.82-1.02)       |
| ARV Q3                         | 695/1781                    | 43.1 (40.2-46.1)                   | 1.08 (0.96-1.20)       | 1.07 (0.96-1.19)       | 1.06 (0.94-1.18)       |
| ARV Q4                         | 770/1796                    | 46.1 (43.5-48.8)                   | 1.19 (1.06-1.32)       | 1.16 (1.04-1.29)       | 1.14 (1.02-1.27)       |
| <i>P</i> for trend             | —                           | < 0.001                            | < 0.001                | < 0.001                | 0.001                  |

MACE: major adverse cardiovascular event; SBP: systolic blood pressure; HR: hazard ratio; CI: confidence interval.

MACE was defined as the first occurrence of all-cause mortality, coronary heart disease, stroke, and heart failure.

Model 1: adjusted for age, sex, race at visit 3;

Model 2: adjusted for model 1 + education level, body mass index; smoking status, drinking status, total cholesterol, high-density lipoprotein cholesterol, prevalent diabetes, use of aspirin and statin at visit 3;

Model 3: adjusted for model 2 + prevalent hypertension; use of antihypertensive drugs; diastolic blood pressure at visit 3, trend and mean of SBP from visit 1 to visit 3.

**Figure S1. Study flowchart with detailed exclusion information.**

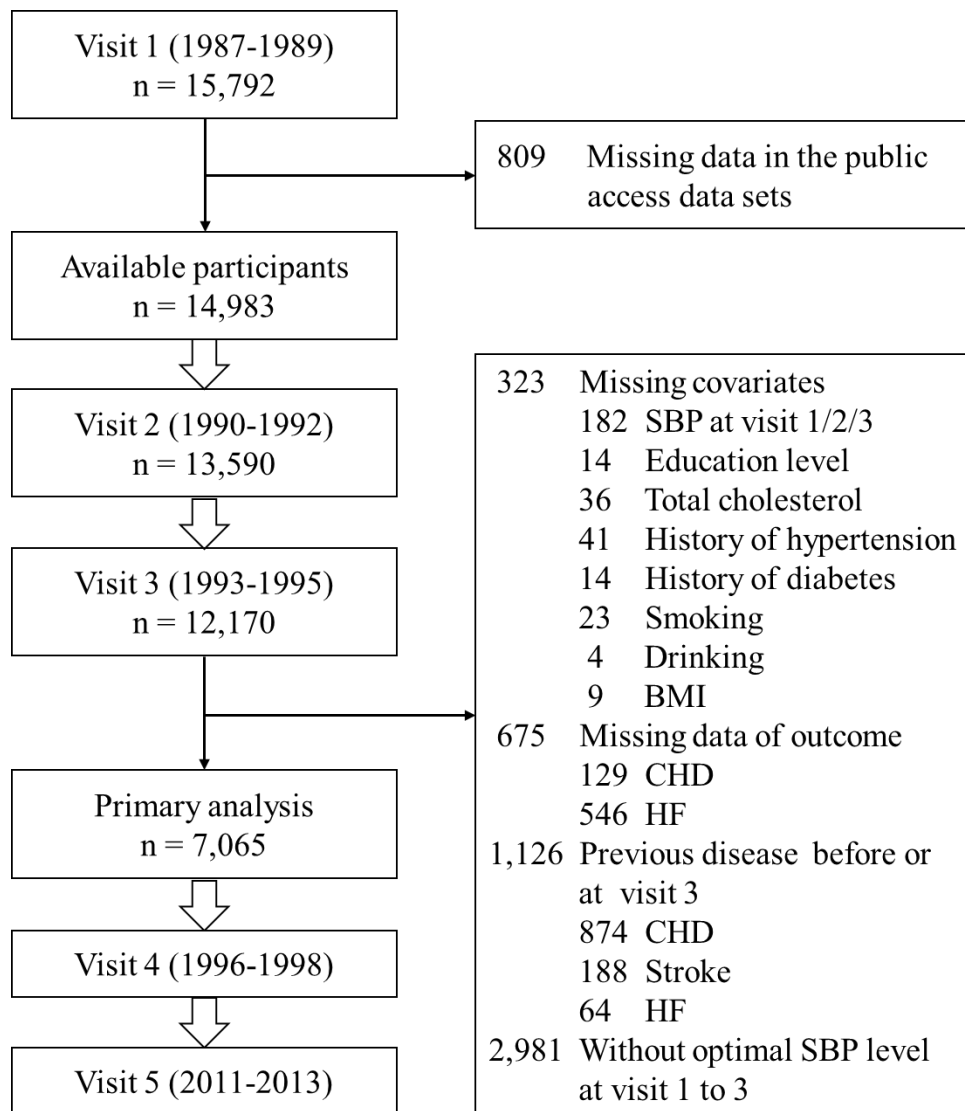

SBP: systolic blood pressure; BMI: body mass index; CHD: coronary heart disease; HF: heart failure.

Figure S2. The calculating formula of SD, CV, ARV and VIM.

|     |   |                                                             |
|-----|---|-------------------------------------------------------------|
| SD  | = | $\sqrt{\frac{\sum_{i=1}^3 (SBP_i - \text{mean SBP})^2}{2}}$ |
| CV  | = | $\frac{SD}{\text{mean SBP}}$                                |
| ARV | = | $\frac{( SBP_2 - SBP_1  +  SBP_3 - SBP_2 )}{2}$             |
| VIM | = | $SD \times \left(\frac{SBP}{\text{mean SBP}}\right)^\rho$   |

SBP: systolic blood pressure; SD: standard deviation; CV: coefficient of variation; ARV: average real variability; VIM: variability independent of the mean; Mean SBP level was calculated across the first 3 visits for each participant;  $i = 1, 2$  and  $3$  denote the measurements of visit 1, 2 and 3;  $\rho$  is the regression coefficient on the basis of regressing the natural logarithm of SD on the natural logarithm of the mean SBP.

**Figure S3. Multivariable-adjusted HRs of MACE according to visit-to-visit SBP variability measured by SD, CV, and ARV in adults with optimal SBP levels.**

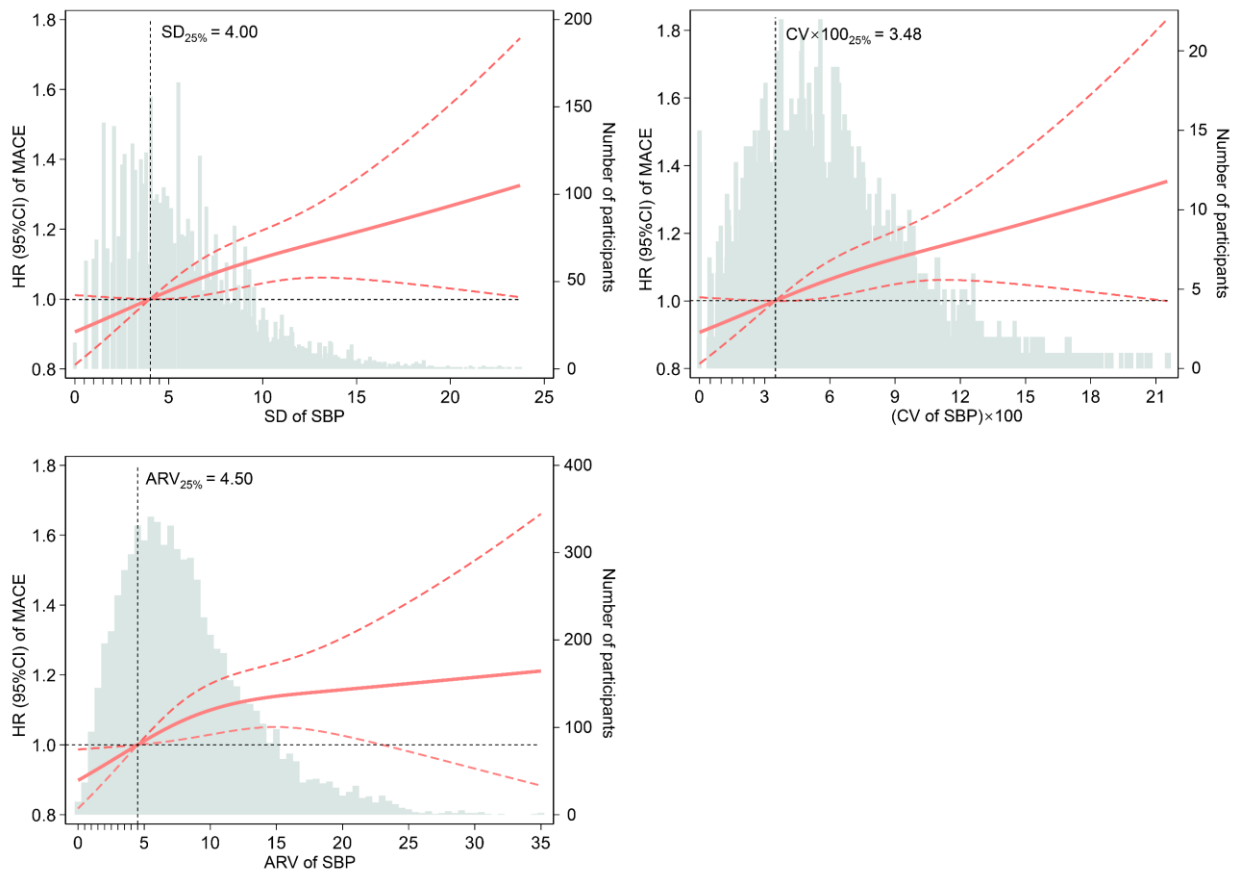

The HRs (orange-red solid line) and 95% CIs (orange-red dotted lines) are derived from the Cox Model 3 that adjusted for age, sex, race, education level, body mass index, smoking status, alcohol use status, total cholesterol, high-density lipoprotein cholesterol, prevalent diabetes, use of aspirin and statin, prevalent hypertension, use of antihypertensive drugs, diastolic blood pressure at visit 3, trend and mean of SBP from visit 1 to visit 3. SBP variability was centred at the 25th percentile of sample and modelled using a restricted cubic spline with knots at the 5th, 50th, and 95th percentiles. Histograms represent the frequency distribution of SBP variability.

HR: hazard ratio; MACE: major adverse cardiovascular event; SBP: systolic blood



pressure; SD: standard deviation; CV: coefficient of variation; ARV: average real variability; CI: confidence interval.
